# Supplementary material
Source: PubMed Central journal article supplement (PMC7785009)
Supplement: 41433_2020_869_MOESM1_ESM.pdf [file 41433_2020_869_MOESM1_ESM.pdf]

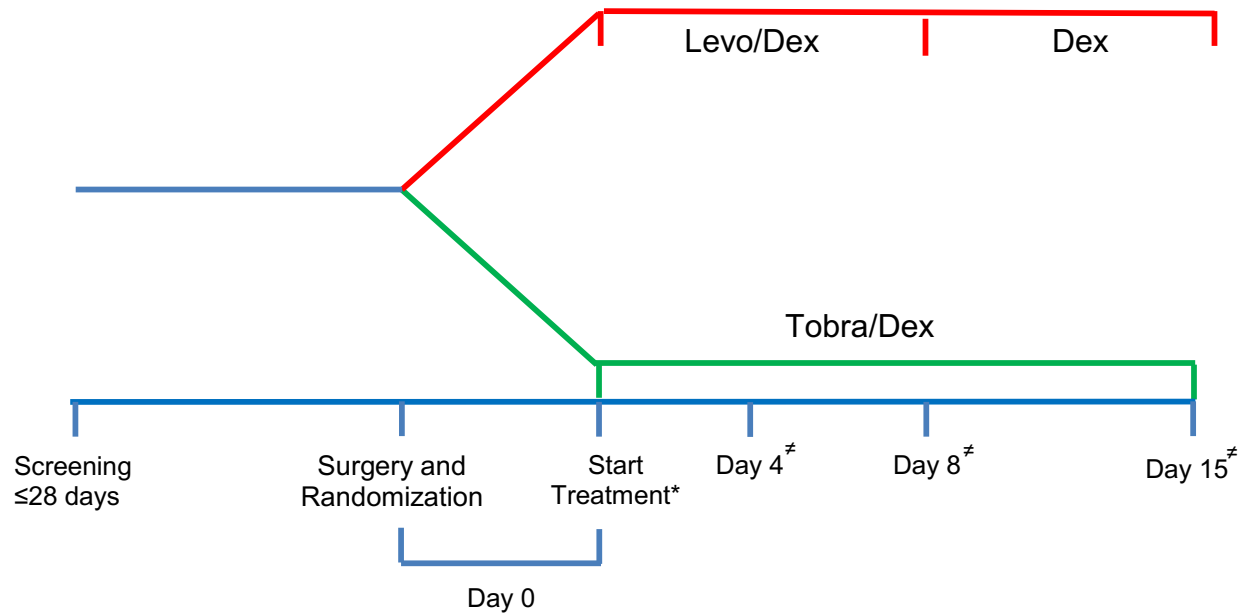

Levo/Dex=levofloxacin/dexamethasone

Dex=dexamethasone

Tobra/Dex=tobramycin/dexamethasone

\* Treatment began either immediately after randomization in patients not bandaged after surgery, or immediately after removal of eye dressing

<sup>#</sup> Control visit

**Figure S1**
