# Supplementary material
Source: PubMed Central journal article supplement (PMC7785009)

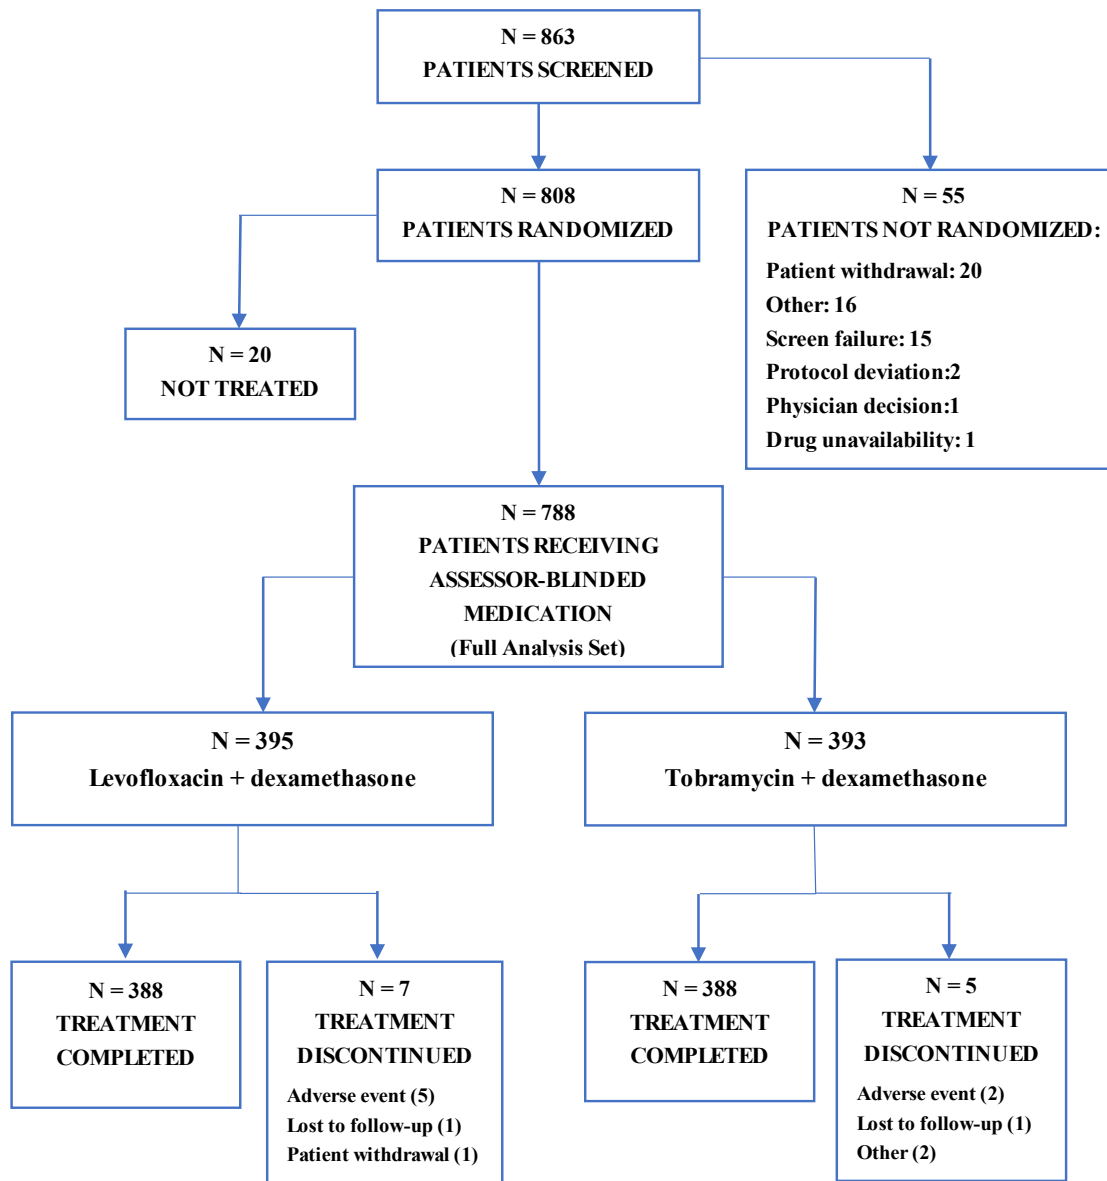

**Figure S2**

Supplement: 41433_2020_869_MOESM2_ESM.pdf [file 41433_2020_869_MOESM2_ESM.pdf]
